# Supplementary material
Source: Springer Nature journal article supplement (https://www.springermedizin.de/resource/supplementary/12916_2012_751_MOESM5_ESM.pdf/9598250)
Supplement: MOESM5 [file 9598250]

# DEVELOPMENTAL PATHWAYS OF FASTER AND SLOWER REPRODUCTIVE STRATEGIES

## FASTER

Marital discord, father absent  
High stress  
Inadequate \$ resources

Harsh, rejecting insensitive  
Inconsistent

Insecure attachment  
Mistrustful internal working model  
Opportunistic interpersonal  
orientation

Early maturation / puberty

Earlier sexual activity  
Short-term, unstable pair bonds  
Limited parental investment  
More offspring

**A. FAMILY CONTEXT**  
Prenatal

**B. CHILDREARING**  
Infancy / Early Childhood

**C. PSYCHOLOGICAL /  
BEHAVIORAL  
DEVELOPMENT**  
Juvenility

**D. SOMATIC  
DEVELOPMENT**  
Puberty

**E. REPRODUCTIVE  
STRATEGY**  
Adulthood

## SLOWER

Spousal harmony, father present  
Adequate \$ resources

Sensitive, supportive, responsive  
Positively affectionate

Secure attachment  
Trusting internal working model  
Reciprocally-rewarding  
interpersonal orientation

Later maturation / puberty

Later sexual activity  
Long-term, enduring pair bonds  
Greater parental investment  
Fewer offspring
